# Supplementary material for: Highly sensitive UV photodetector based on solution-processed bismuth oxyiodide epitaxial thin films
Source: Royal Society of Chemistry journal article supplement (doi:10.1039/d3tc00140g), 2023-01-01
Supplement: d3tc00140g1.pdf [file d3tc00140g1.pdf]

## Electronic Supplementary Information (ESI)

# Highly Sensitive UV Photodetector Based on Solution-processed Bismuth Oxyiodide Epitaxial Thin Films

Zaichun Sun,<sup>a</sup> Yihao Wang,<sup>\*b</sup> and Bingchu Mei<sup>a</sup>

<sup>a</sup> State Key Laboratory of Advanced Technology for Materials Synthesis and Processing,  
Wuhan University of Technology, Wuhan, 430070, China

<sup>b</sup> Department of Physics, Southern University of Science and Technology, Shenzhen, 518055,  
China

### Corresponding author

\*E-mail: wangyh6@sustech.edu.cn

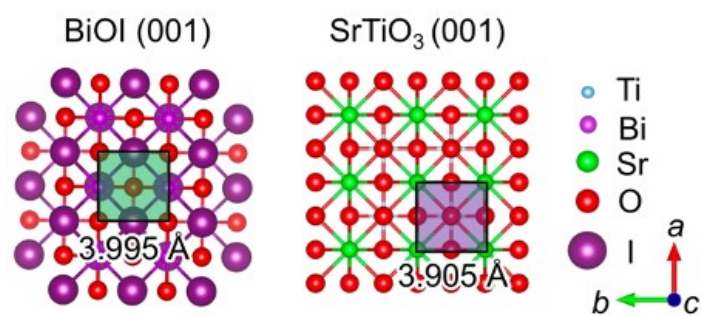

**Figure S1.** Crystal structures of STO (001) plane and BiOI (001) plane drawn by VESTA.

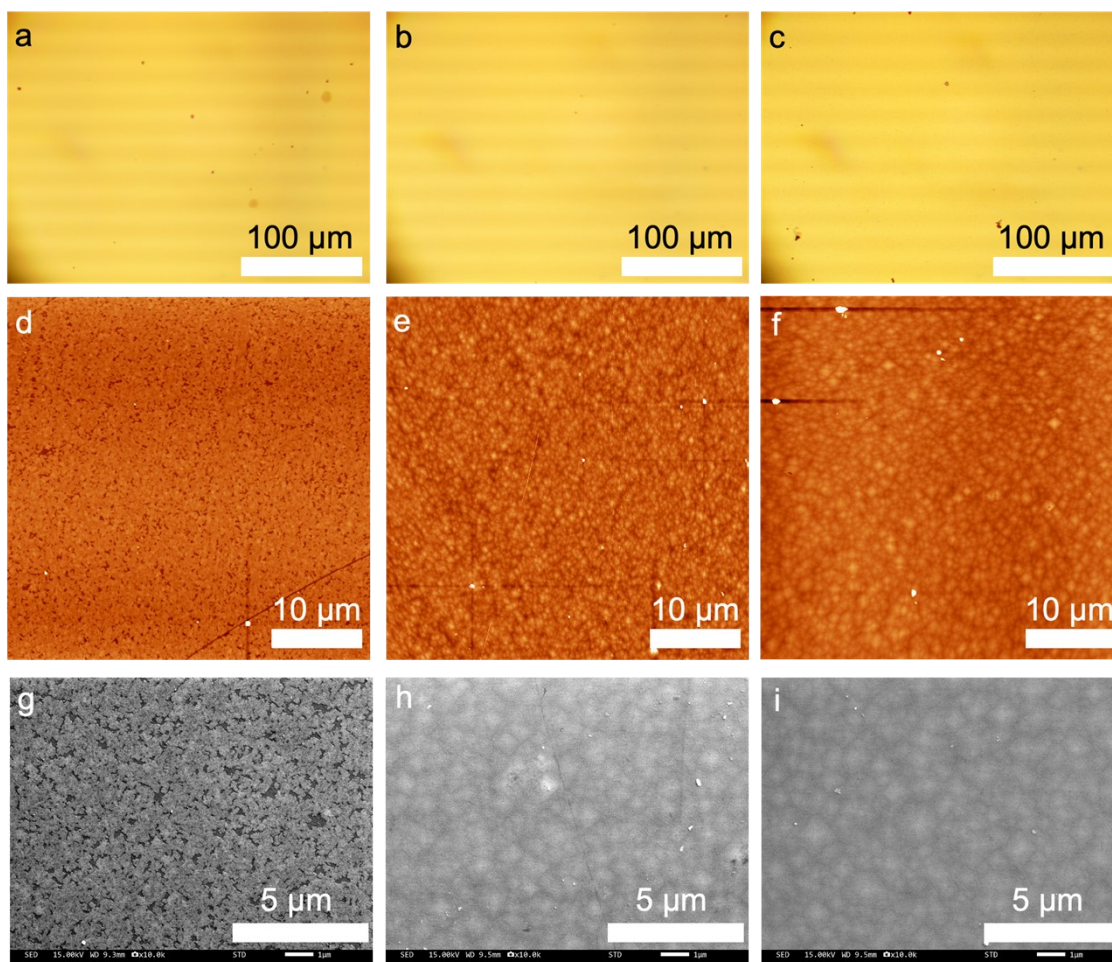

**Figure S2.** a)-c) Wide-scale optical images, d)-f) AFM images, and g)-i) local-scale SEM images of BiOI thin films synthesized with various time: (a, d, g) 5 min, (b, e, h) 10 min, and (c, f, i) 15 min.

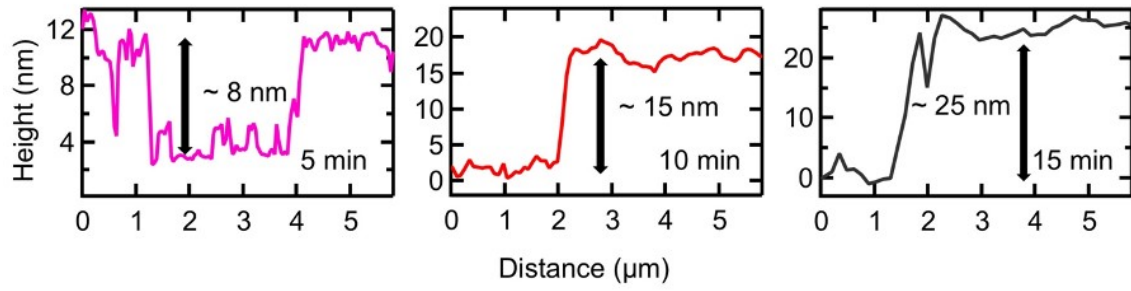

**Figure S3.** Height profiles for BiOI thin films synthesized with various time.

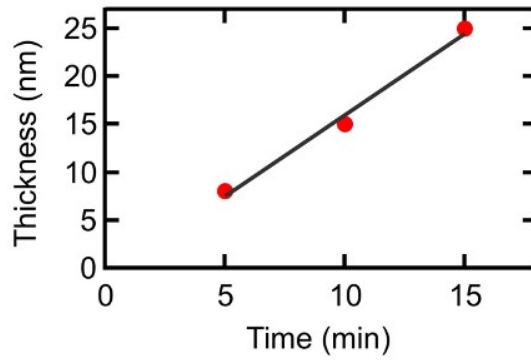

**Figure S4.** Thickness of BiOI epitaxial thin films as a function of deposition time.

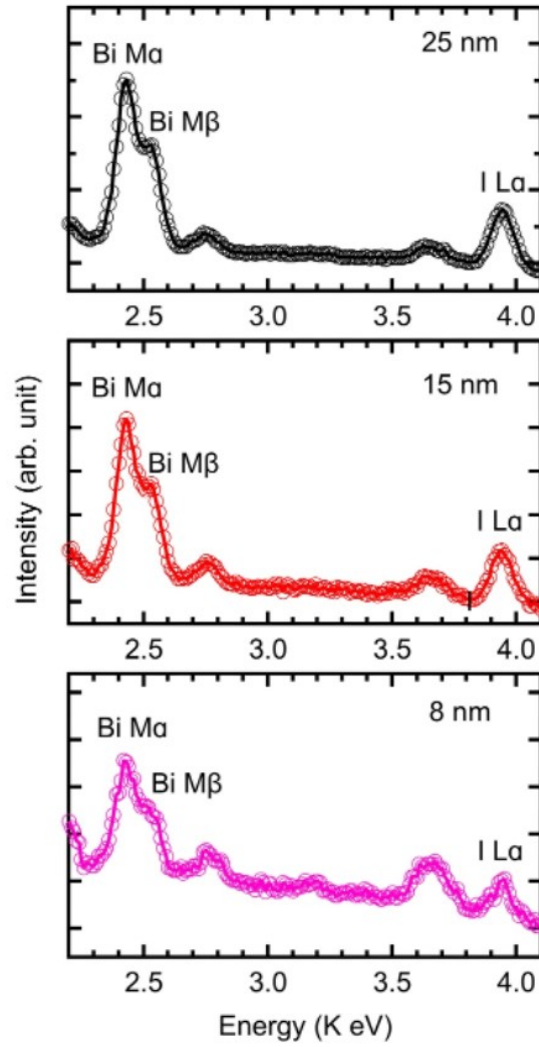

**Figure S5.** Energy dispersive X-ray spectra for BiOI epitaxial thin films with different thickness.

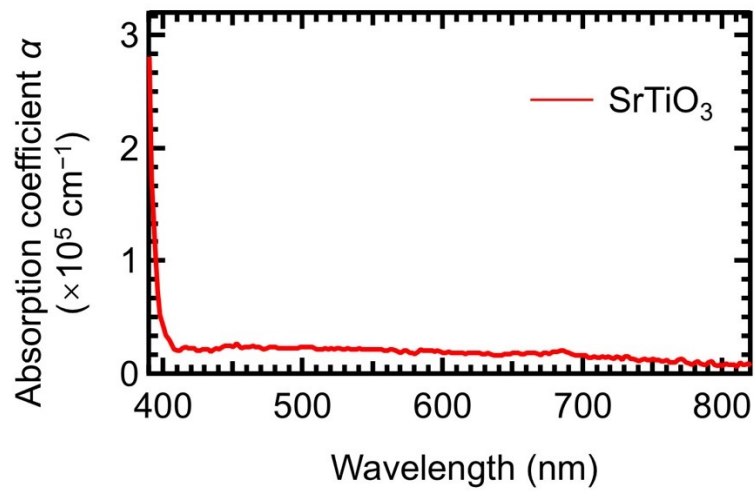

**Figure S6.** Absorption spectrum of STO substrate.

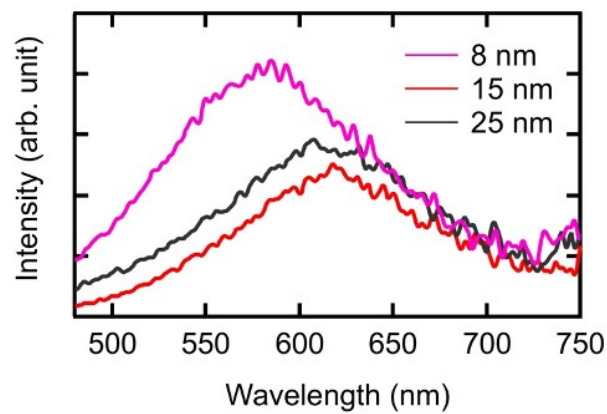

**Figure S7.** Steady-state PL spectra of BiOI epitaxial thin films under the excitation wavelength of 450 nm.

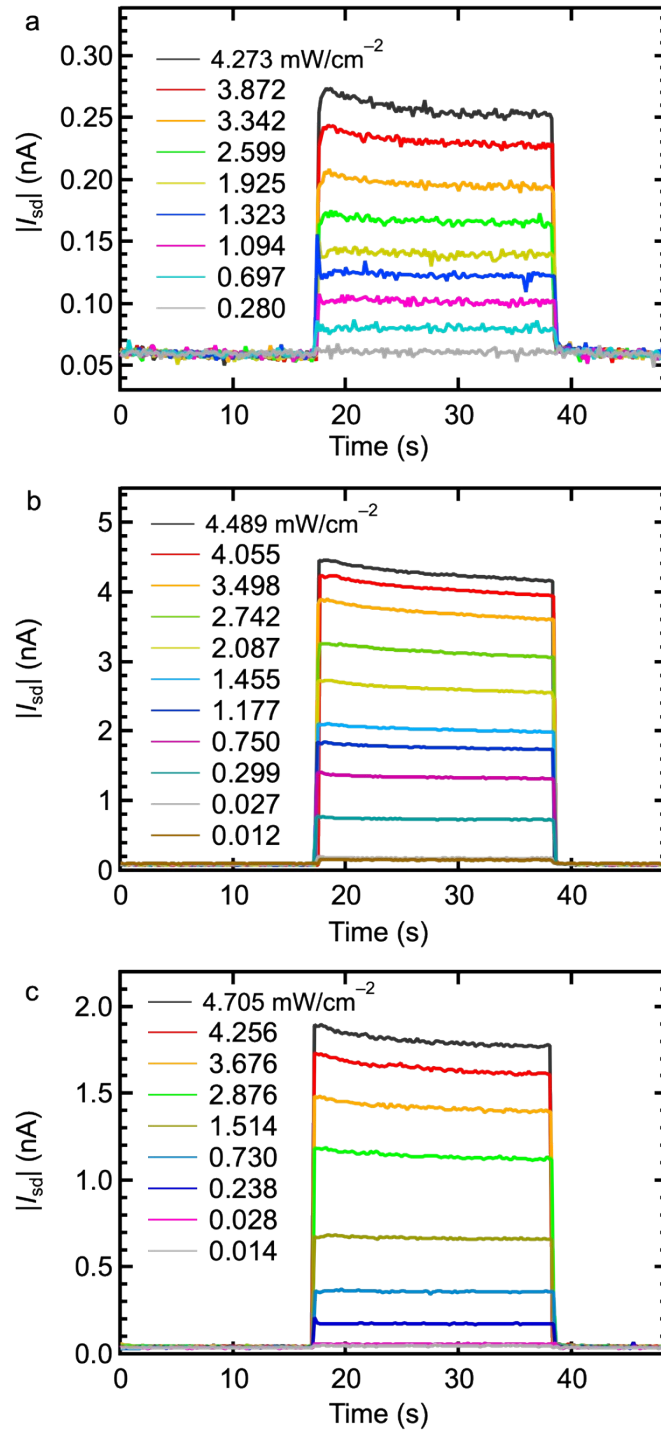

**Figure S8.** Time-resolved photoresponse of BiOI photodetectors with thickness of a) 8 nm b) 15 nm and c) 25 nm to on-off illumination of 405 nm light with various power density at  $V_{ds} = -10$  V.

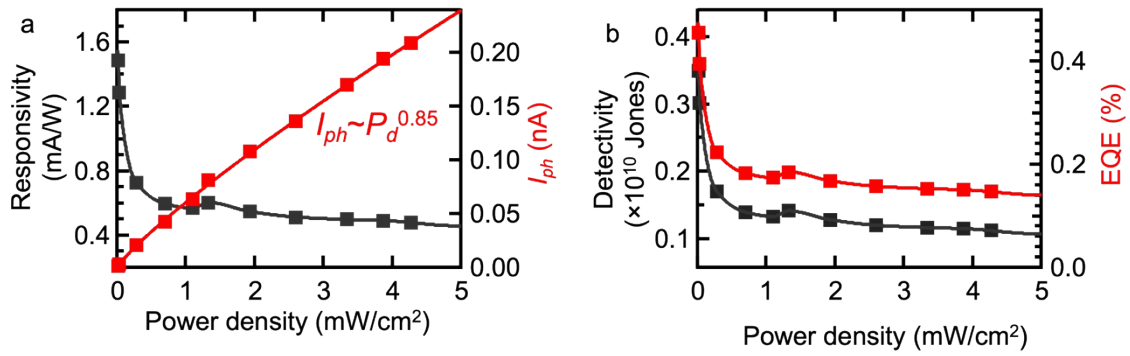

**Figure S9.** Optoelectrical properties of 8 nm BiOI photodetector under the illumination with various power density. a)  $I_{ph}$ ,  $R$ . b)  $D^*$  and  $EQE$  as the function of light power density. The dots and lines denote the experimental and fitting results, respectively.

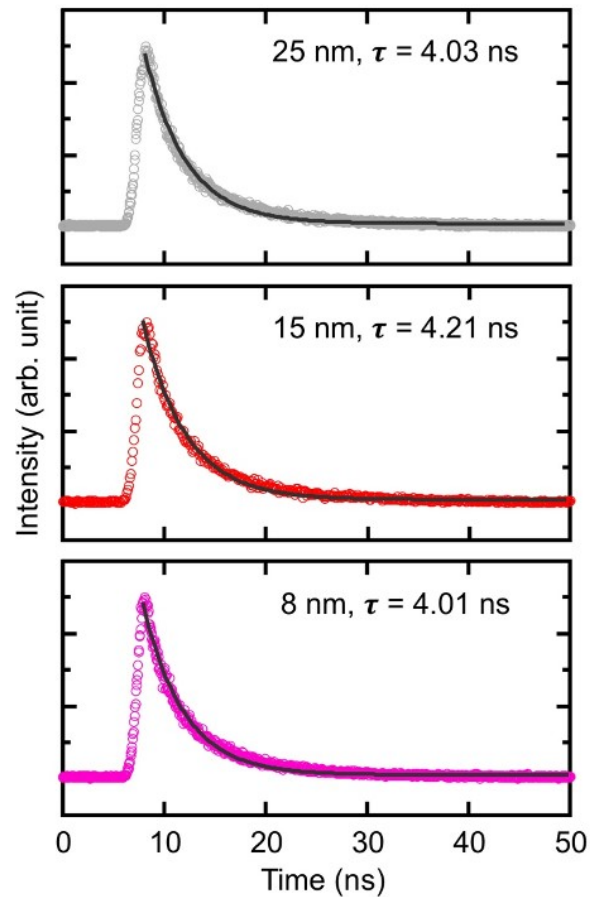

**Figure S10.** Time-resolved PL spectra monitored at 550 nm excited by 450 nm solid laser for BiOI epitaxial thin films with various thickness.

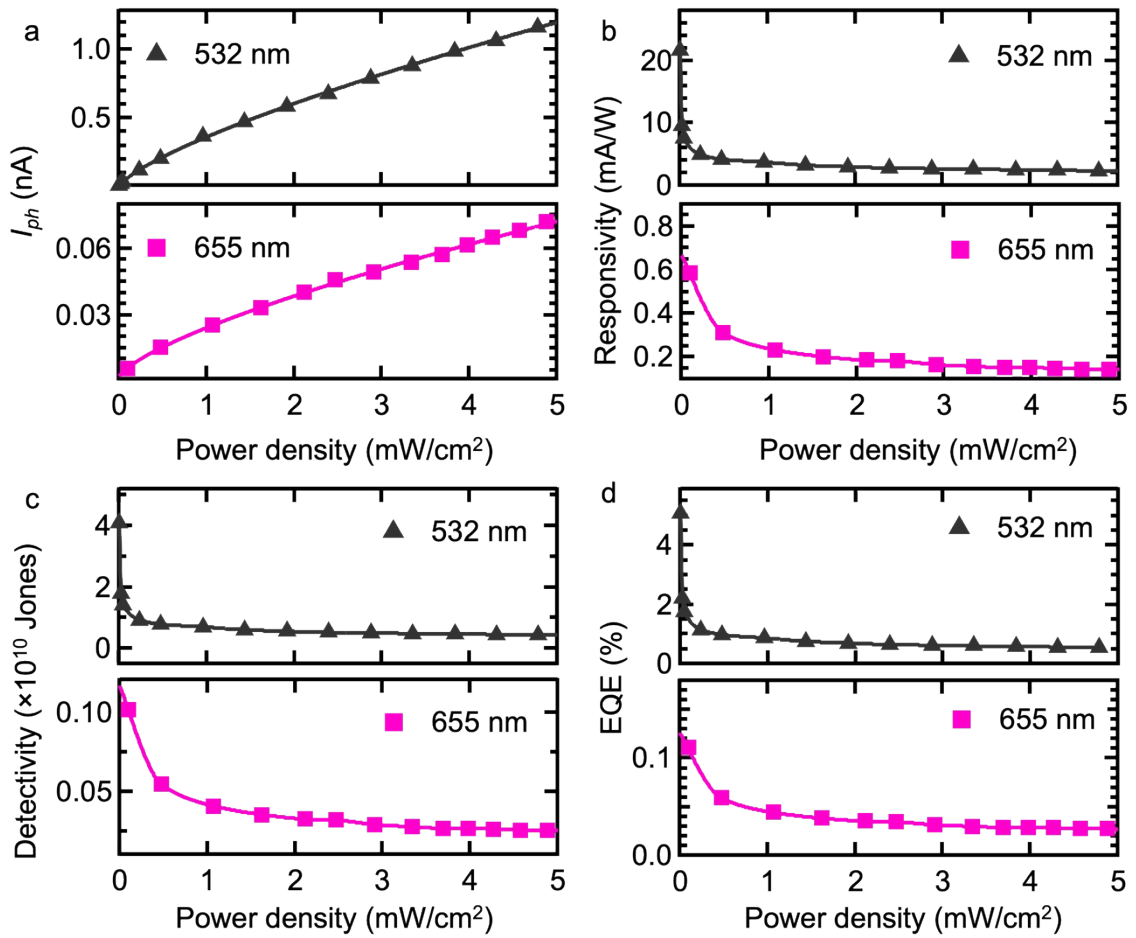

**Figure S11.** Optoelectrical properties of 15 nm BiOI photodetector under the illumination with various wavelength and power density. a)-d)  $I_{ph}$ ,  $R$ ,  $D^*$  and  $EQE$  as the function of light power density. The dots and lines denote the experimental and fitting results, respectively.



**Table S1.** Photoelectric properties based on Epitaxial Growth BiOI films compare with other commercial and 2D materials.

| Materials | Format & Size                             | Responsivity<br>[mA W <sup>-1</sup> ] | Detectivity<br>[Jones] | EQE [%] | Spectral range | Ref       |
|-----------|-------------------------------------------|---------------------------------------|------------------------|---------|----------------|-----------|
| BiOI      | Square Nanoplates<br>(~ 120 μm)           | 26                                    | $8.2 \times 10^{11}$   | 6.9     | 473 nm         | S1        |
| BiOCl     | Nanosheet-like film,<br>centimeter scale  | 0.057                                 | -                      | -       | 350 nm         | S2        |
| hBN       | 2D material                               | 9.2                                   | $3.96 \times 10^{10}$  | -       | 226 nm         | S3        |
| GaN       | film                                      | 50                                    | -                      | -       | 365 nm         | S4        |
| BiOBr     | Square Nanoplates<br>(~ 100 μm)           | 50                                    | $6.3 \times 10^{10}$   | 13      | 473 nm         | S5        |
| BiOI      | Epitaxial thin films,<br>centimeter scale | 43.5                                  | $8.7 \times 10^{10}$   | 13      | 405 nm         | This work |

## References

- S1 W. Zeng, J. Li, L. Feng, H. Pan, X. Zhang, H. Sun and Z. Liu. *Adv. Funct. Mater.* 2019, **29**, 1900129.
- S2 W. Ouyang, L. Su and X. Fang. *Small* 2018, **14**, 1–11.
- S3 Y. Wang, J. Meng, Y. Tian, Y. Chen, X. Zhang. *ACS Appl. Mater. Interfaces* 2020, **12**, 27361–27367.
- S4 C. J. Lee, C. H. Won, J. H. Lee, S. H. Hahm and H. Park. *Sensors* 2017, **17**, 1684.
- S5 P. Liu, L. Yin, L. Feng, Y. Sun, H. Sun, W. Xiong, C. Xia, Z. Wang and Z. Liu. *Sci. China Mater.* 2021, **64**, 189–197.
